# Supplementary material for: Protein primary structure correlates with calcium oxalate stone matrix preference
Source: PLoS One. 2021 Sep 23;16(9):e0257515. doi: 10.1371/journal.pone.0257515 (PMC8459966; doi:10.1371/journal.pone.0257515)
Supplement: S1 Table — The list of the top 60 most highly abundant and highly prevalent proteins found in CaOx stone matrix (from Table 2 in [reference 8]) was reduced by removing 7 proteins, including UROM (uromodulin), EGF (epidermal growth factor), APOD (apolipoprotein D), ALBU (albumin), IGKC (Ig kappa chain C region), IGHG1 (Ig gamma-2 chain C) and IPSP (plasma serine protease inhibitor) that were found at higher relative abundance in urine than in stone matrix. Additionally, ubiquitin was also removed from this list due to an ambiguous definition of this protein in updated protein databases, leaving 52 proteins that were found to be enriched in CaOx stone matrix in [Reference 8]. The abbreviations, accession numbers, and protein names are given for each protein, as well as the number of aspartate (D), glutamate (E), arginine (R), and lysine (K) residues in each protein, listed as both absolute totals and percentages for each amino acid. Total charge and net charge were calculated for each protein as described in the Methods section, and each was listed as both absolute totals and percentages for these 52 proteins. A column containing updated accession numbers for 3 proteins which had changed from the original publication has been added. (XLSX) [file pone.0257515.s001.xlsx]

## Sheet: Stone matrix preferring protein
Abbr	Accession No.	Updated accession No.	Protein	D, aspartic acid #	D %	E, glutamic acid #	E %	K, lysine #	K %	R, arginine #	R %	D+E #	K+R #	D+E %	K+R %	Net Charge Number	Net Charge Percentage	Total Charge Percentage	Molecular Weight
SET	Q01105		Phosphatase 2A inhibitor I2PP2A	32	11	54	18.6	23	7.9	10	3.4	86	33	29.6	11.3	-53	-18.3	40.9	33488.6
OSTP	P10451		Osteopontin	48	15.3	27	8.6	19	6.1	10	3.2	75	29	23.9	9.3	-46	-14.6	33.2	35422.4
NUCL	P19338		Nucleolin	73	10.3	103	14.5	90	12.7	26	3.7	176	116	24.8	16.4	-60	-8.4	41.2	76613.9
NPM	Q96EA5	P06748	Nucleophosmin	34	11.6	31	10.5	33	11.2	8	2.7	65	41	22.1	13.9	-24	-8.2	36	32574.8
HS90A	P07900		Heat shock protein HSP 90-alpha	54	7.4	97	13.3	80	10.9	30	4.1	151	110	20.7	15	-41	-5.7	35.7	84659
TBB2C	P68371		Tubulin beta-2C	24	5.4	38	8.5	15	3.4	22	4.9	62	37	13.9	8.3	-25	-5.6	22.2	49830.7
TBB5	P07437		Tubulin beta	26	5.9	36	8.1	15	3.4	22	5	62	37	14	8.4	-25	-5.6	22.4	49670.5
HS90B	P08238		Heat shock protein HSP 90-beta	51	7	96	13.3	75	10.4	32	4.4	147	107	20.3	14.8	-40	-5.5	35.1	83263.5
PON1	P27169		Serum paraoxonase	17	4.8	26	7.3	20	5.6	6	1.7	43	26	12.1	7.3	-17	-4.8	19.4	39731
APOA4	P06727		Apolipoprotein A-IV	19	4.8	49	12.4	28	7.1	26	6.6	68	54	17.2	13.7	-14	-3.5	30.9	45371.8
VMO1	Q7Z5L0		Vitelline membrane outer layer protein 1	13	6.4	10	5	4	2	12	5.9	23	16	11.4	7.9	-7	-3.5	19.3	21533.9
MASP2	Q9UBP3	O00187	Mannan-binding lectin serine protease 2	39	5.7	42	6.1	31	4.5	28	4.1	81	59	11.8	8.6	-22	-3.2	20.4	75701.7
FIBG	P02679		Fibrinogen gamma	34	7.5	26	5.7	34	7.5	12	2.6	60	46	13.2	10.1	-14	-3.1	23.3	51511.3
PROZ	P22891		Vitamin K-dependent protein Z	16	4	33	8.3	15	3.8	22	5.5	49	37	12.3	9.3	-12	-3	21.6	44743.6
ATPB	P06576		ATP synthase subunit beta	27	5.1	37	7	23	4.3	26	4.9	64	49	12.1	9.2	-15	-2.9	21.3	56559.4
GAS6	Q14393		Growth-arrest-specific protein 6	39	5.8	48	7.1	23	3.4	46	6.8	87	69	12.9	10.2	-18	-2.7	23.1	74924.5
APOA1	P02647		Apolipoprotein A-I	16	6	30	11.2	22	8.2	17	6.4	46	39	17.2	14.6	-7	-2.6	31.8	30777.6
CO9	P02748		Complement C9	35	6.3	48	8.6	37	6.6	33	5.9	83	70	14.9	12.5	-13	-2.4	27.4	63172.7
MYH9	P35579		Myosin-9	106	5.4	271	13.8	207	10.6	123	6.3	377	330	19.2	16.9	-47	-2.3	36.1	226531
HMGB1	P09429		High mobility group protein B1	20	9.3	36	16.7	43	20	8	3.7	56	51	26	23.7	-5	-2.3	49.7	24893.6
VTNC	P04004		Vitronectin	32	6.7	34	7.1	20	4.2	36	7.5	66	56	13.8	11.7	-10	-2.1	25.5	54305.1
FIBA	P02671		Fibrinogen alpha	50	5.8	64	7.4	43	5	54	6.2	114	97	13.2	11.2	-17	-2	24.4	94972.4
PROS	P07225		Vitamin K-dependent protein S	34	5	52	7.7	48	7.1	24	3.6	86	72	12.7	10.7	-14	-2	23.4	75121.9
THRB	P00734		Prothrombin	35	5.6	51	8.2	29	4.7	44	7.1	86	73	13.8	11.8	-13	-2	25.6	70036.3
CLUS	P10909		Clusterin	24	5.3	43	9.6	29	6.5	29	6.5	67	58	14.9	13	-9	-1.9	27.9	52494.2
PGDH	P15428		Prostaglandin dehydrogenase	15	5.6	13	4.9	17	6.4	6	2.3	28	23	10.5	8.7	-5	-1.8	19.2	28977.1
MA1A1	P33908		Alpha-1,2-mannosidase IA	27	4.1	59	9	42	6.4	32	4.9	86	74	13.1	11.3	-12	-1.8	24.4	72967.9
SODE	P08294		Superoxide dismutase [Cu-Zn]	14	5.8	15	6.3	5	2.1	20	8.3	29	25	12.1	10.4	-4	-1.7	22.5	25850.7
HSPB1	P04792		Heat shock protein beta-1	10	4.9	16	7.8	7	3.4	16	7.8	26	23	12.7	11.2	-3	-1.5	23.9	22782.3
APOE	P02649		Apolipoprotein E	11	3.5	40	12.6	13	4.1	34	10.7	51	47	16.1	14.8	-4	-1.3	30.9	36153.8
CO3	P01024		Complement C3	90	5.4	123	7.4	113	6.8	82	4.9	213	195	12.8	11.7	-18	-1.1	24.5	187147
ITIH1	P19827		Inter-alpha-trypsin inhibitor 1	59	6.5	44	4.8	47	5.2	46	5	103	93	11.3	10.2	-10	-1.1	21.5	101388
S10A8	P05109		S100-A8 (Calgranulin-A)	6	6.5	9	9.7	12	12.9	2	2.2	15	14	16.2	15.1	-1	-1.1	31.3	10834.4
PRG2	P13727		Bone-marrow proteoglycan	7	3.2	20	9	6	2.7	19	8.6	27	25	12.2	11.3	-2	-0.9	23.5	25205.3
HEP2	P05546		Heparin cofactor 2	31	6.2	28	5.6	33	6.6	22	4.4	59	55	11.8	11	-4	-0.8	22.8	57070.2
LMAN2	Q12907		Lectin, mannose-binding 2	26	7.3	16	4.5	17	4.8	22	6.2	42	39	11.8	11	-3	-0.8	22.8	40228.4
HRG	P04196		Histidine-rich glycoprotein	31	5.9	28	5.3	22	4.2	33	6.3	59	55	11.2	10.5	-4	-0.7	21.7	59578
HBB	Q9BX96	P68871	Hemoglobin beta	7	4.8	8	5.4	11	7.5	3	2	15	14	10.2	9.5	-1	-0.7	19.7	15998.3
CFAB	P00751		Complement factor B	46	6	48	6.3	53	6.9	38	5	94	91	12.3	11.9	-3	-0.4	24.2	85532.3
GGH	Q92820		Gamma-glutamyl hydrolase	13	4.1	20	6.3	23	7.2	9	2.8	33	32	10.4	10	-1	-0.4	20.4	35964.1
ASSY	P00966		Argininosuccinate synthase	16	3.9	35	8.5	33	8	20	4.9	51	53	12.4	12.9	2	0.5	25.3	46530.1
TRAP1	Q12931		Tumor necrosis factor type 1 receptor-associated protein	34	4.8	60	8.5	44	6.3	53	7.5	94	97	13.3	13.8	3	0.5	27.1	80109.2
HBD	P02042		Hemoglobin delta	7	4.8	7	4.8	11	7.5	4	2.7	14	15	9.6	10.2	1	0.6	19.8	16055.4
HBA	P69905		Hemoglobin alpha	8	5.6	4	2.8	11	7.7	3	2.1	12	14	8.4	9.8	2	1.4	18.2	15257.4
PERM	P05164		Myeloperoxidase	36	4.8	35	4.7	22	3	66	8.9	71	88	9.5	11.9	17	2.4	21.4	83867.7
PERE	P11678		Eosinophil peroxidase	39	5.5	21	2.9	20	2.8	83	11.6	60	103	8.4	14.4	43	6	22.8	81039.5
CATG	P08311		Cathepsin G	8	3.1	10	3.9	4	1.6	34	13.3	18	38	7	14.9	20	7.9	21.9	28837
ECP	P12724		Eosinophil cationic protein	6	3.8	1	0.6	2	1.3	18	11.3	7	20	4.4	12.6	13	8.2	17	18385.2
SRSF3	P84103		Ser/Arg splicing factor 3	9	5.5	10	6.1	5	3	40	24.4	19	45	11.6	27.4	26	15.8	39	19329.4
H4	P62805		Histone H4	3	2.9	4	3.9	11	10.7	14	13.6	7	25	6.8	24.3	18	17.5	31.1	11367.3
SRSF7	Q16629		Ser/Arg splicing factor 7	9	3.8	10	4.2	7	2.9	58	24.4	19	65	8	27.3	46	19.3	35.3	27366.2
SRSF2	Q01130		Ser/Arg splicing factor 2	12	5.4	9	4.1	12	5.4	53	24	21	65	9.5	29.4	44	19.9	38.9	25476
